# Supplementary material
Source: publisher figshare collection journal article supplement (https://acs.figshare.com/ndownloader/files/3964270)
Supplement: Supplementary file 1 [file 3964270]

Supporting Information for:

**Anchoring a Molecular Iron Catalyst to Solar-Responsive WO<sub>3</sub>  
Improves the Rate and Selectivity of Photoelectrochemical Water  
Oxidation**

*Benjamin M. Klepser and Bart M. Bartlett\**

Department of Chemistry, University of Michigan, 930 North University Ann Arbor, MI United States

| <i>Index</i>                                                                                                           | <i>Page</i> |
|------------------------------------------------------------------------------------------------------------------------|-------------|
| <b>Experimental Section</b>                                                                                            | <b>S2</b>   |
| <b>Figure S1.</b> Solution electrochemistry of catalysts <b>1</b> and <b>2</b>                                         | S5          |
| <b>Figure S2.</b> UV-Vis and Raman spectra of WO <sub>3</sub> , <b>1</b> , and <b>1</b> -WO <sub>3</sub>               | S6          |
| <b>Figure S3.</b> Cyclic voltammetry of WO <sub>3</sub> , <b>1</b> , and <b>1</b> -WO <sub>3</sub>                     | S6          |
| <b>Figure S4.</b> Low temperature EPR of <b>1</b> after electrolysis                                                   | S7          |
| <b>Figure S5.</b> Bulk Electrolysis to determine coverage of <b>1</b> on WO <sub>3</sub>                               | S8          |
| <b>Figure S6.</b> Dark LSVs of <b>1</b> -WO <sub>3</sub> and WO <sub>3</sub> and CV of <b>1</b> -FTO                   | S8          |
| <b>Figure S7.</b> Control LSVs of WO <sub>3</sub> soaked only in acetonitrile, in FeCl <sub>2</sub> , or tebppmcn      | S9          |
| <b>Figure S8.</b> SEM thickness of optimized WO <sub>3</sub>                                                           | S9          |
| <b>Figure S9.</b> LSVs with thinner WO <sub>3</sub>                                                                    | S10         |
| <b>Figure S10.</b> LSVs varying pH on <b>1</b> -WO <sub>3</sub>                                                        | S11         |
| <b>Figure S11.</b> Two Additional O <sub>2</sub> evolution runs                                                        | S12         |
| <b>Figure S12.</b> Faradaic efficiency of <b>1</b> -WO <sub>3</sub> for 12 hours                                       | S12         |
| <b>Figure S13.</b> Faradaic efficiency of tebppmcn-WO <sub>3</sub>                                                     | S13         |
| <b>Figure S14.</b> Fe 2p XPS of <b>1</b> -WO <sub>3</sub> electrodes                                                   | S13         |
| <b>Figure S15.</b> Faradaic efficiency of a single <b>1</b> -WO <sub>3</sub> electrode subsequent runs                 | S14         |
| <b>Figure S16.</b> Faradaic efficiency of a WO <sub>3</sub> with <b>1</b> in solution                                  | S14         |
| <b>Figure S17.</b> ESI+ mass spectrometry of <b>1</b> -WO <sub>3</sub> electrolyte after electrolysis                  | S15         |
| <b>Figure S18.</b> CV of the concentrated electrolyte solution after photoelectrolysis.                                | S15         |
| <b>Figure S19.</b> SEM of <b>1</b> -WO <sub>3</sub> electrode before and after electrolysis                            | S16         |
| <b>Table S1.</b> Faradaic efficiencies of O <sub>2</sub> experiments for WO <sub>3</sub> and <b>1</b> -WO <sub>3</sub> | S16         |

## Experimental Section

### General Methods

All reactions were carried out under a nitrogen atmosphere unless otherwise noted. THF, CH<sub>3</sub>CN, and CH<sub>2</sub>Cl<sub>2</sub> were dried prior to use according to common practices. All other materials were obtained from commercial sources, and used as purchased. Column chromatography was performed using standard 200 mesh silica gel. Elemental analyses were performed by Atlantic Microlab, Inc. for C, H, N, and Cl determinations. <sup>1</sup>HNMR and <sup>13</sup>CNMR spectra were recorded in CDCl<sub>3</sub> or CD<sub>3</sub>CN using a Varian MR400 at 400 MHz. Electrospray ionization mass spectra were collected on a Micromass LCT TOF MS through a Waters 1525 GC. UV/Visible/NIR spectroscopy was performed on an Agilent CaryWin 5000.

### Synthesis

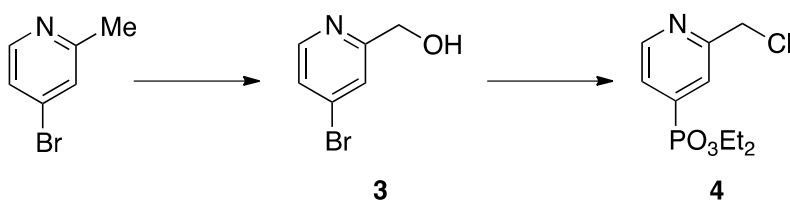

#### Preparation of **3**<sup>1</sup>:

4-bromo-2-methylpyridine (4.30 g, 25.0 mmol) in 100 mL CHCl<sub>3</sub> was stirred with 70 wt% *m*-CPBA (8.01 g, 32.5 mmol) open to air for 2 hours. The reaction was quenched with 15 mL saturated NaHCO<sub>3</sub>, and the resulting layers were separated. The aqueous layer was extracted with 30 mL CH<sub>2</sub>Cl<sub>2</sub> (2×). The combined organic layers were washed with 30 mL of 2 M HCl, dried with Na<sub>2</sub>SO<sub>4</sub>, filtered, and concentrated.

The resulting yellow oil was dissolved in 50 mL acetic anhydride and heated to 90 °C under air overnight. The dark solution was concentrated by vacuum distillation, and the residue was cooled to room temperature and dissolved in 30 mL methanol. The resulting solution was cooled to 0 °C. KOH (2.8 g, 50.0 mmol) was added to the chilled solution, and upon complete addition the ice bath was removed. The solution was warmed to room temperature and stirred for 3 hours. The reaction was concentrated under reduced pressure. The dark residue was taken up into 50 mL ethyl acetate and washed with saturated NaHCO<sub>3</sub>. The aqueous layer was extracted with additional ethyl acetate (2× 50 mL) and the combined organic layers were dried with Na<sub>2</sub>SO<sub>4</sub>, filtered, and concentrated. The crude product was purified on silica with 50% ethyl acetate/hexanes. The desired alcohol **3** (2.04 g) was isolated in 43% yield over three steps. <sup>1</sup>HNMR(CDCl<sub>3</sub>, ppm): 8.32 (d, 1H), 7.49 (s, 1H), 7.345 (d, 1H), 4.71 (s, 2H), 4.13 (broad, 1H); <sup>13</sup>CNMR(ppm): 161.13, 149.17, 133.79, 125.78, 124.11, 63.91; ESI-MS<sup>+</sup>: [**3**+H]<sup>+</sup> = 187.2 m/z

#### Preparation of **4**<sup>1,2</sup>:

Palladium acetate (8.5 mg, 0.038 mmol), dppf (42.0 mg, 0.076 mmol), and KOAc (16 mg, 0.17 mmol) were dissolved in 5 mL THF. Triethylamine (0.27 mL, 1.9 mmol) was added to the reaction and the solution was heated to 70 °C under N<sub>2</sub> for 15 minutes. To the hot reaction, diethyl phosphite (0.16 mL, 1.27 mmol) and 4-bromo-2-(hydroxymethyl)pyridine (250 mg, 1.33 mmol) were added and the reaction was refluxed overnight. The reaction was cooled to room temperature and the reaction was concentrated under reduced pressure.

The crude residue was then taken into 5 mL of CH<sub>2</sub>Cl<sub>2</sub> and cooled to 0 °C. Thionyl chloride (0.27 mL, 3.70 mmol) in 3 mL CH<sub>2</sub>Cl<sub>2</sub> was added dropwise over 5 minutes. The resulting suspension was warmed to room temperature and stirred for 4 hours in air. The reaction was concentrated, and the brown residue was taken into 25 mL CH<sub>2</sub>Cl<sub>2</sub> and washed with 25 mL saturated NaHCO<sub>3</sub>. The resulting aqueous layer was extracted with CH<sub>2</sub>Cl<sub>2</sub> (2× 25 mL) and the combined organic layers were washed with brine. Finally,

the organic layer was dried with Na<sub>2</sub>SO<sub>4</sub>, filtered, and concentrated under reduced pressure. This yielded the desired product **4** (239 mg) as a brown residue that was sufficiently pure by NMR in 72% yield over two steps. <sup>1</sup>HNMR(CDCl<sub>3</sub>, ppm): 8.68 (t, 1H), 7.80 (d 1H), 7.57 (dd, 1H), 4.68 (s, 2H), 4.13 (m, 4H), 1.31 (t, 6H); <sup>13</sup>CNMR(ppm): 157.10, 149.69, 139.81, 124.535, 124.34, 62.835, 46.20, 16.30; <sup>31</sup>PNMR(ppm): 14.0; ESI-MS<sup>+</sup>: [4+H]<sup>+</sup> = 263.9 m/z

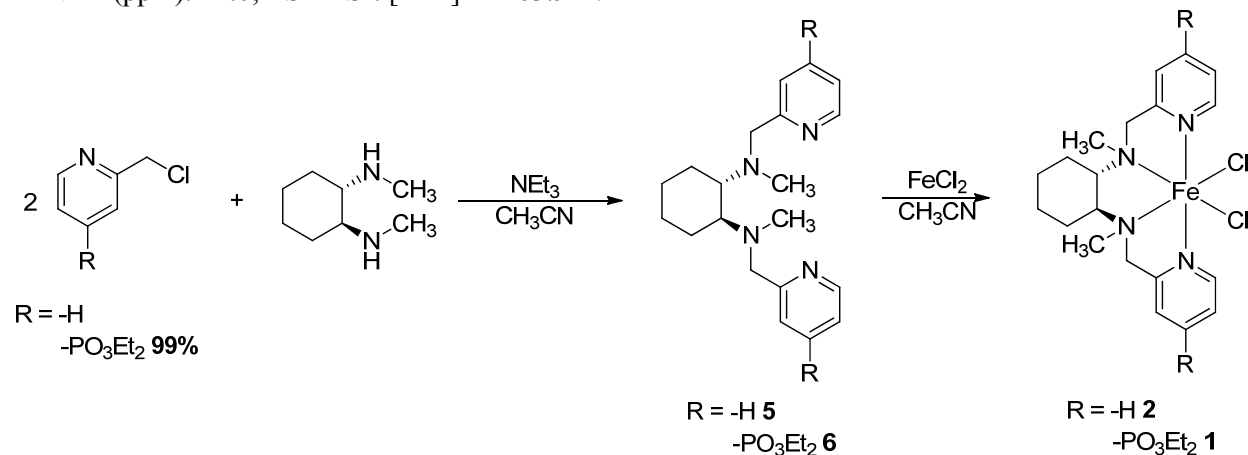

#### General Preparation of **5** or **6**:

**5**: “bpmcn” R = H <sup>1</sup>HNMR(CDCl<sub>3</sub>, ppm): 8.46 (dd, 2H), 7.545 (m, 4H), 7.08 (q, 2H), 3.83 (q, 4H), 2.635 (d, 2H), 2.27 (s, 6H), 1.955 (d, 2H), 1.735 (d, 2H), 1.28 (d, 2H), 1.13, (d, 2H); <sup>13</sup>CNMR(ppm): 161.44, 148.57, 136.17, 122.77, 121.48, 64.56, 60.46, 36.62, 25.84; ESI-MS<sup>+</sup>: [6+H]<sup>+</sup> = 323.8 m/z

**6**: “tebppmcn” R = PO<sub>3</sub>Et<sub>2</sub>

The racemic cyclohexane diamine (54 mg, 0.38 mmol) was dissolved in 5 mL of acetonitrile. Triethylamine (0.16 mL, 1.13 mmol) and **4** (199 mg, 0.76 mmol) were added to the stirring solution. The reaction was heated to 100 °C and attached with a long reflux condensor. After heating the reaction overnight, it was cooled to room temperature and concentrated under reduced pressure. The residue was dissolved in 10 mL CH<sub>2</sub>Cl<sub>2</sub> and washed with 10 mL saturated NaHCO<sub>3</sub>. The aqueous layer was extracted an additional 2 times with CH<sub>2</sub>Cl<sub>2</sub>. The combined organic layers were dried with Na<sub>2</sub>SO<sub>4</sub>, filtered, and concentrated. The crude product was purified on silica with 86% ethyl acetate, 10% methanol, and 4% conc. NH<sub>4</sub>OH (R<sub>f</sub> ~0.5). Fractions collected from the column were dried with Na<sub>2</sub>SO<sub>4</sub>, filtered, and concentrated under reduced pressure. This yielded an orange oil (173 mg, 58%). <sup>1</sup>HNMR(CDCl<sub>3</sub>, ppm): 8.58 (t, 2H), 7.875 (d, 2H), 7.455 (q, 2H), 4.09 (m, 8H), 3.91 (s, 4H), 2.575 (d, 2H), 2.28 (s, 6H), 1.875 (d, 2H), 1.68 (d, 2H), 1.25 (m, 14H), 1.07 (t, 2H); <sup>13</sup>CNMR(ppm): 148.98, 138.52, 136.69, 124.41, 123.22, 63.95, 62.63, 60.86, 36.78, 26.93, 25.64, 16.27; <sup>31</sup>PNMR 15.26; ESI-MS<sup>+</sup>: [5+H]<sup>+</sup> = 597.0 m/z<sup>+</sup>

#### General Preparation of **1** or **2**<sup>3</sup>:

1.0 eq. of ligand was added to 5 mL acetonitrile under N<sub>2</sub>. To the stirring solution, 1.0 eq. of anhydrous FeCl<sub>2</sub> was added, and the reaction immediately turned from orange to purple (**1**) or yellow (**2**). The reaction was stirred overnight and concentrated under reduced pressure. If a precipitate was present, the solid was isolated as the pure product (**2**) and rinsed with diethyl ether. If no precipitate formed, the solution was concentrated and dried in a vacuum oven, yielding the pure complex. X-ray quality crystals were obtained by slow diffusion of ether into a concentrated solution of the complex in CH<sub>3</sub>CN.

**1**: <sup>1</sup>HNMR(CD<sub>3</sub>CN, ppm): 108.3, 62.07, 51.92, 51.39, 14.90, 8.0, 3.94, 2.01, 1.43, 0.16, -2.18, -2.85, -11.73; ESI-MS<sup>+</sup>: [Fe(tebppmcn)Cl(CH<sub>3</sub>CN)]<sup>+</sup> = 721.4 m/z<sup>+</sup>; [Fe(tebppmcn)(Cl)<sub>1.7</sub>(HO)<sub>0.3</sub>•0.7H<sub>2</sub>O] EA: (theory) C 46.12, H 6.59, N 7.68, Cl 8.10; (found) C 45.27, H 6.47, N 7.67, Cl 8.06

**2:** <sup>1</sup>HNMR(CD<sub>3</sub>CN, ppm): 109.48, 63.25, 54.58, 51.27, 20.43, 15.46, 3.17, 2.49, 1.98, 0.10, -19.03; ESI-MS<sup>+</sup>: [Fe(bpmcn)Cl(CH<sub>3</sub>CN)]<sup>+</sup> = 423.4 m/z<sup>+</sup>, [Fe(bpmcn)Cl<sub>2</sub>•0.5H<sub>2</sub>O] EA: (theory) C 52.20, H 6.35, N 12.17, Cl 15.41; (found) C 52.10, H 6.29, N 12.21, Cl 15.13

WO<sub>3</sub> was prepared by a previously reported method.<sup>4</sup>

Modification of WO<sub>3</sub> with **1**:

WO<sub>3</sub> electrodes were heated to 80 °C in a 500 μM **1**/acetonitrile solution and sealed in a vial. The anodes were soaked for 8 hours in the dark and then rinsed with excess acetonitrile and dried with N<sub>2</sub>. This procedure resulted in a light yellow tint to the modified electrodes.

### ***Electrochemistry***

All electrochemistry was performed on either a CH Instruments CHI-600 or CHI-1000 potentiostat. All potentials are referenced to SCE (saturated calomel electrode) with saturated KCl electrolyte reference electrode (RE), and Pt was used as the counter electrode (CE) in all experiments. Non-aqueous solvents were dried prior to use and TBAPF<sub>6</sub> was recrystallized from EtOH prior to use. Glassy carbon (GC) was used as the working electrode (WE) for solution-based electrochemistry. Aqueous solutions were prepared using 18.2 Ω Milli-pore H<sub>2</sub>O and concentrated sulfuric acid, and then pH adjusted with 7 M NaOH to obtain the desired concentration and pH. The aqueous solutions were also purged with N<sub>2</sub> prior to use, but were not sealed under N<sub>2</sub>. All photoelectrochemical measurements were carried out in custom-built cells with quartz viewing windows. All illumination was carried out using a Newport Oriel 150 W Xe lamp fitted with an AM1.5G filter from Newport whose power was adjusted to 100 mW/cm<sup>2</sup>.

### ***Faradaic Efficiency: Oxygen Detection***

Oxygen was quantified using a FOSSPOR fluorescence probe using two-point calibration at 20.90% and 0.00% O<sub>2</sub>. O<sub>2</sub> evolution experiments were carried out in a custom-built two-sided cell with quartz windows, where the O<sub>2</sub> probe, working electrode, and reference electrode were on one side, with the temperature probe and the Pt auxiliary electrode on the other side. The solutions were purged with N<sub>2</sub> overnight, and then sealed under N<sub>2</sub> on a Schlenk line. The photoelectrode was illuminated at 100 mW/cm<sup>2</sup> filtered with AM 1.5G and the potential was held at 809 mV vs. SCE in pH 3 Na<sub>2</sub>SO<sub>4</sub> (1.23 V vs. NHE). After collecting a stable 0% baseline for ~30 minutes, the photoanode was illuminated for ~3 hours. Following illumination, the O<sub>2</sub> was allowed to reach a stable O<sub>2</sub> level for ~30 minutes to allow for temperature fluctuations with the probe. Finally, the run was successful if the O<sub>2</sub> returned near 20.90% after re-exposing the O<sub>2</sub> probe to air. Faradaic efficiency was determined by dividing the measured moles of O<sub>2</sub> by the theoretical yield, determined by dividing the total charge passed during the experiment by 4F (4-electron oxidation, F = 96,485.34 C/mol e<sup>-</sup>).

### ***Faradaic Efficiency: Non-oxygen Detection***

Non-oxygen by-products from photoelectrolysis were measured by quantifying the amount of Fe<sup>2+</sup> that was oxidized by the non-O<sub>2</sub> oxidants in solution (mainly S<sub>2</sub>O<sub>8</sub><sup>2-</sup>, HSO<sub>5</sub><sup>-</sup>, and H<sub>2</sub>O<sub>2</sub>) according to the following reactions.

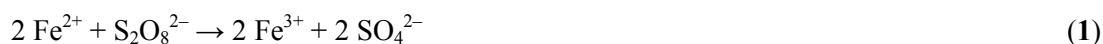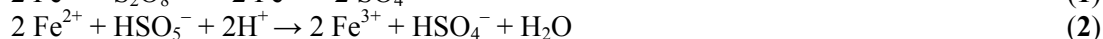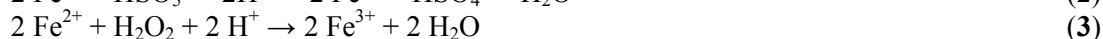

The amount of  $\text{Fe}^{3+}$  generated in the second reaction was quantified by addition of excess  $\text{Na}(\text{SCN})$ . The amount of  $\text{Fe}^{3+}$  generated was determined using Beer's law and 1 mol of  $\text{Fe}^{3+}$  was generated for every 1 mol of  $\text{e}^-$  not used to oxidize water completely, and thus the Faradaic efficiency of the cells for non- $\text{O}_2$  production was measured. To perform the reaction, 2.0 mL of 5 mM  $\text{FeSO}_4$  in 100 mM pH 3  $\text{Na}_2\text{SO}_4$  and 1.0 mL of the test solution were mixed and equilibrated for 15 minutes to allow for the reaction to go to completion.  $\text{NaSCN}$  was added to the solutions ( $\sim 40$  mM) to generate the deep red  $[\text{Fe}(\text{SCN})_6]^{3-}$  species, detectable by UV-Vis spectroscopy ( $\epsilon = 172 \text{ M}^{-1} \text{ cm}^{-1}$  at  $\lambda_{\text{max}} = 465 \text{ nm}$ ). The measurement was standardized using  $\text{Ce}(\text{HSO}_4)_4$ . If the reactions were not carried out in aerated solutions and during the time frame of the experiments then the detected concentrations of the non- $\text{O}_2$  oxidants was significantly diminished.

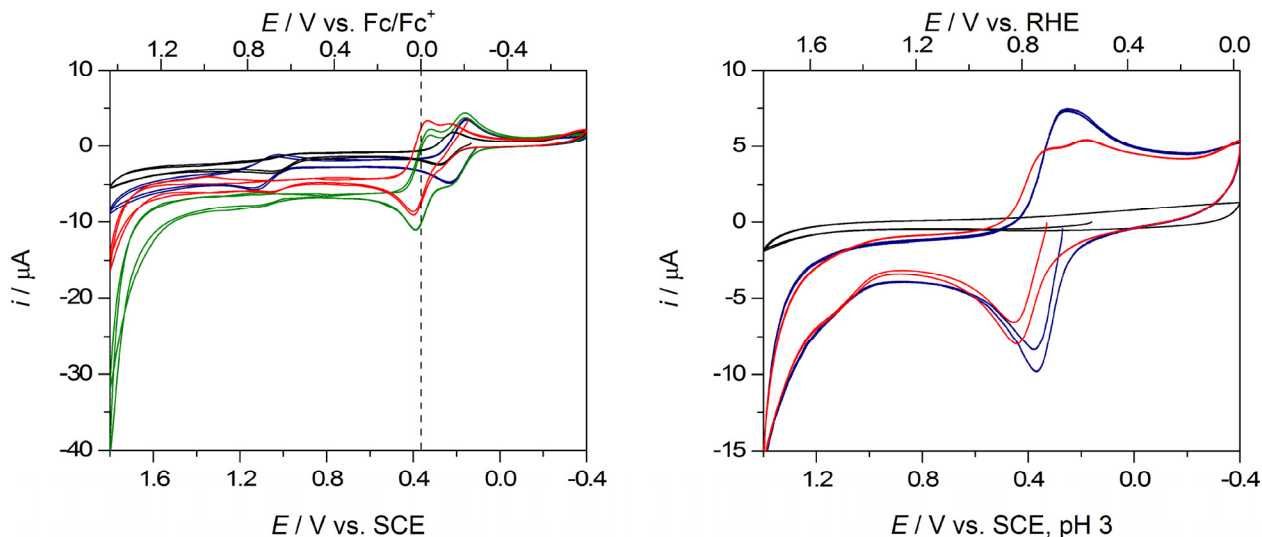

**Figure S1.** Left: Solution electrochemistry of 0.5 mM catalyst **1** (black) and **2** (blue) in 100 mM  $\text{TBAPF}_6$   $\text{CH}_3\text{CN}$  without Fc; 0.5 mM **1** (red) and **2** (green) with 0.5 mM Fc at 20 mV/s; Right: 1 mM **1** (red) or **2** (blue) in 100 mM  $\text{Na}_2\text{SO}_4$  pH 3 (blank = black) at 50 mV/s using GC WE, SCE RE, Pt CE.

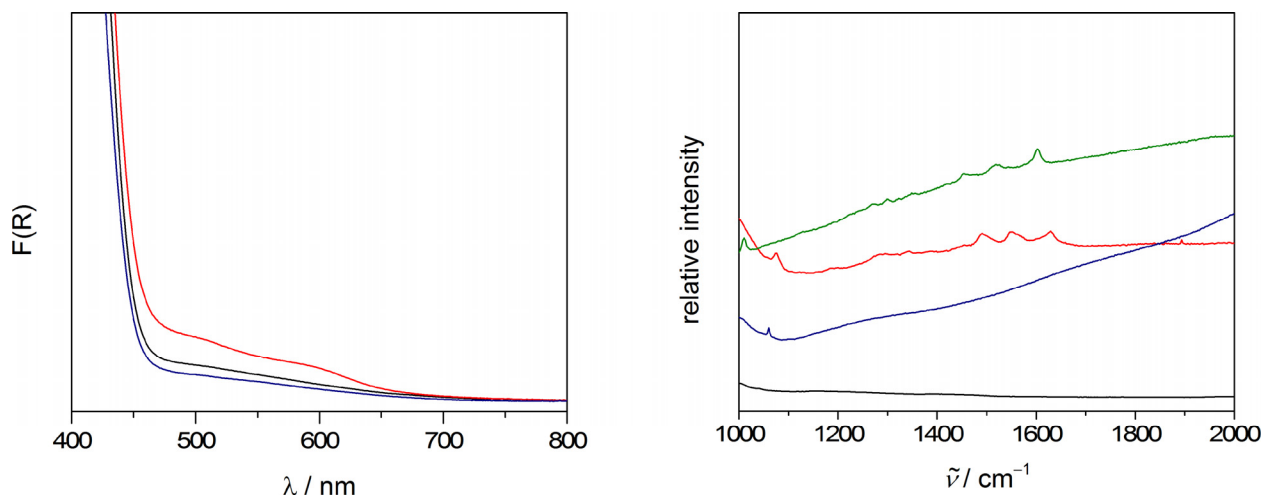

**Figure S2.** Left: Diffuse reflectance spectroscopy of WO<sub>3</sub> film (black), 1-WO<sub>3</sub> before electrolysis (red) and after electrolysis (blue); Right: Raman spectroscopy of WO<sub>3</sub> electrode (black), 1-WO<sub>3</sub> before electrolysis (red), 1-WO<sub>3</sub> after electrolysis (blue), and 1 powder (green).

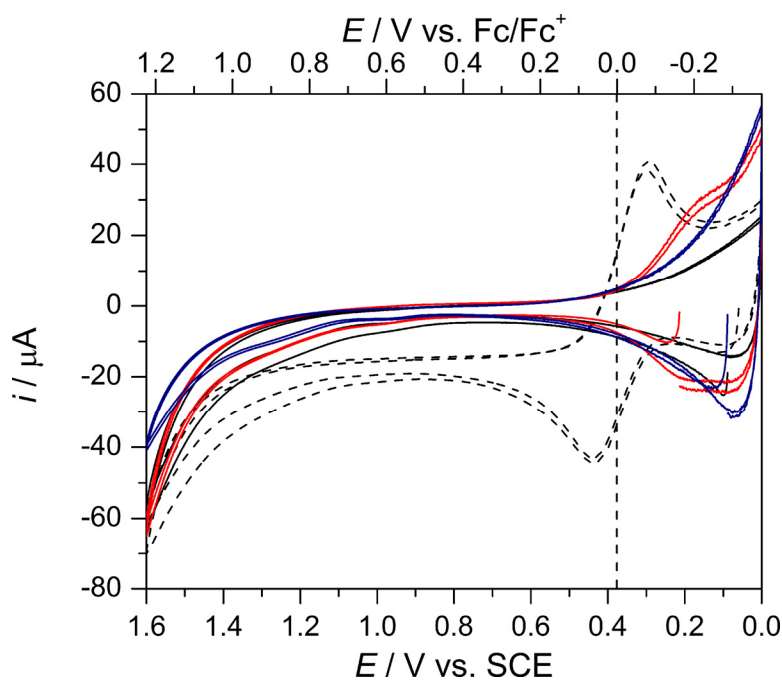

**Figure S3.** Cyclic voltammetry of bare WO<sub>3</sub> photoanode (black) with added Fc (dashed) and 1-WO<sub>3</sub> photoanode before LSVs (red) and after LSVs (blue) in 100 mM TBAPF<sub>6</sub> CH<sub>3</sub>CN; CV's recorded at 20 mV/s with SCE RE and Pt CE in the dark.

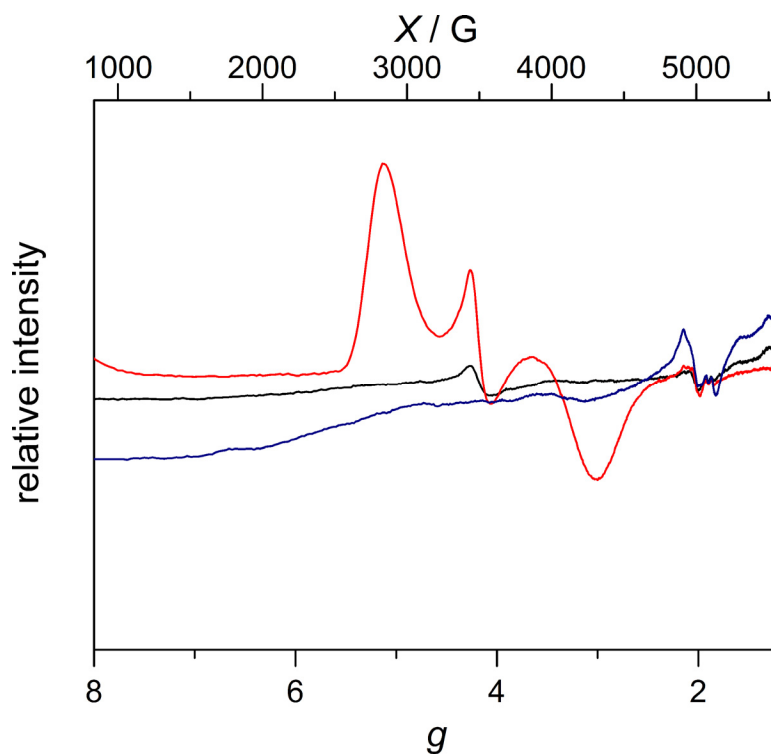

**Figure S4.** EPR at 4 K of 2.5 mM **1** in 100 mM TBAPF<sub>6</sub> CH<sub>3</sub>CN at open circuit potential (black), after electrolysis at 0.6 V vs. SCE (red), and after electrolysis at 1.6 V vs. SCE (blue). Electrolysis was performed in a two compartment cell separated by a glass frit using a 1 cm<sup>2</sup> carbon felt electrode WE and SCE RE in one side with the 2.5 mM **1** solution and Pt mesh CE on the other side with blank electrolyte.

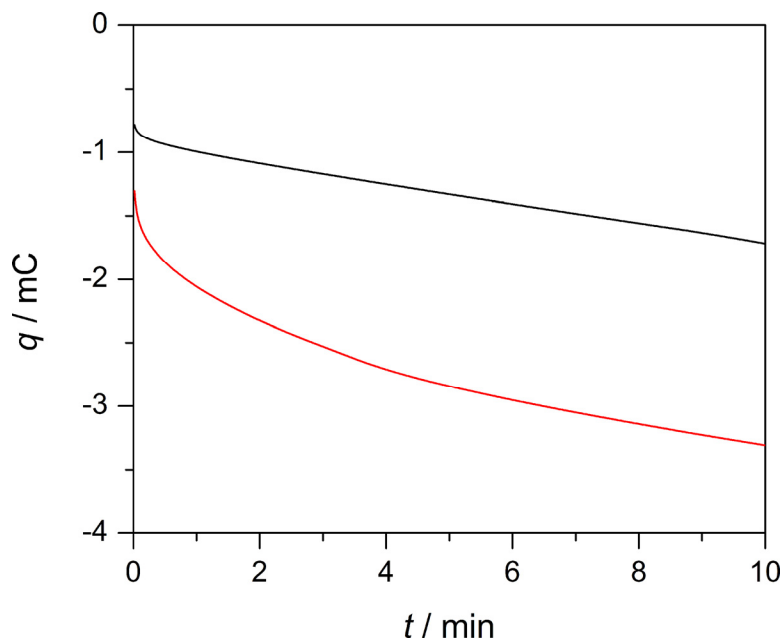

**Figure S5.** Bulk electrolysis ( $q$  vs.  $t$ ) of bare  $\text{WO}_3$  photoanode (black) and a typical **1**- $\text{WO}_3$  photoanode (red) before any other electrochemistry in 100 mM  $\text{TBAPF}_6$  in  $\text{CH}_3\text{CN}$ ; potential held at 0.43 V vs.  $\text{Fc}^+/\text{Fc}^0$  (0.8 V vs. SCE) with SCE RE and Pt CE in the dark. The coverage of **1** on this film was  $15.65 \text{ nmol cm}^{-2}$  based on coulometry (i.e. after 5 minutes:  $n = q/F = (0.00284 - 0.00133)/96,485 = 15.65 \times 10^{-9} \text{ moles e}^- \text{ passed} = 15.65 \times 10^{-9} \text{ moles Fe}^{2+} \text{ oxidized to Fe}^{3+}$ )

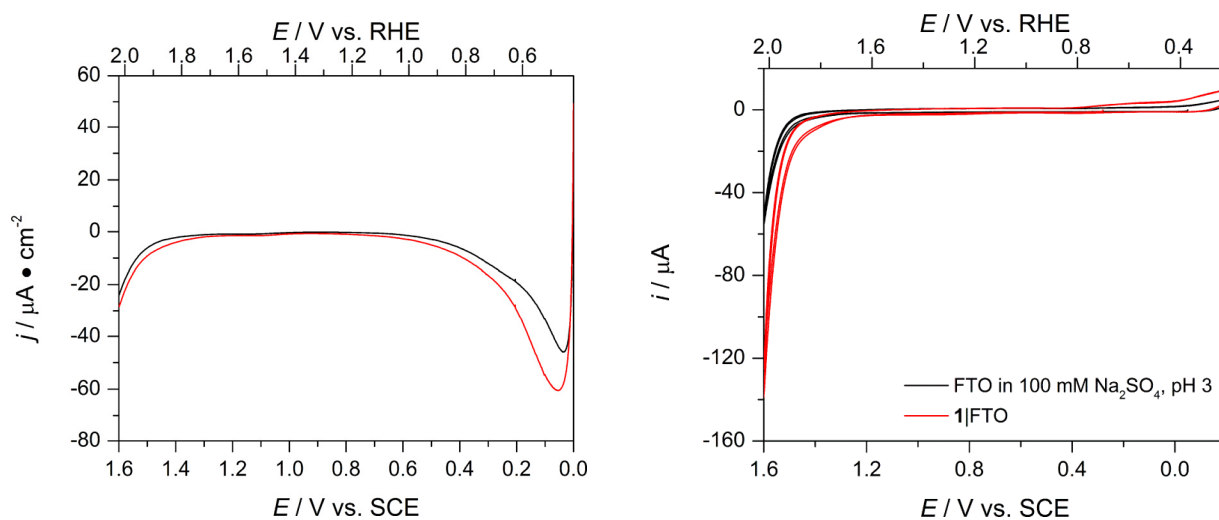

**Figure S6.** Left: Linear sweep voltammetry of bare  $\text{WO}_3$  photoanode (black) and **1**- $\text{WO}_3$  photoanode (red) in 100 mM  $\text{Na}_2\text{SO}_4$  pH 3; LSVs recorded at 20 mV/s with SCE RE and Pt CE in the dark. Right: CVs of **1**-FTO recorded under similar conditions.



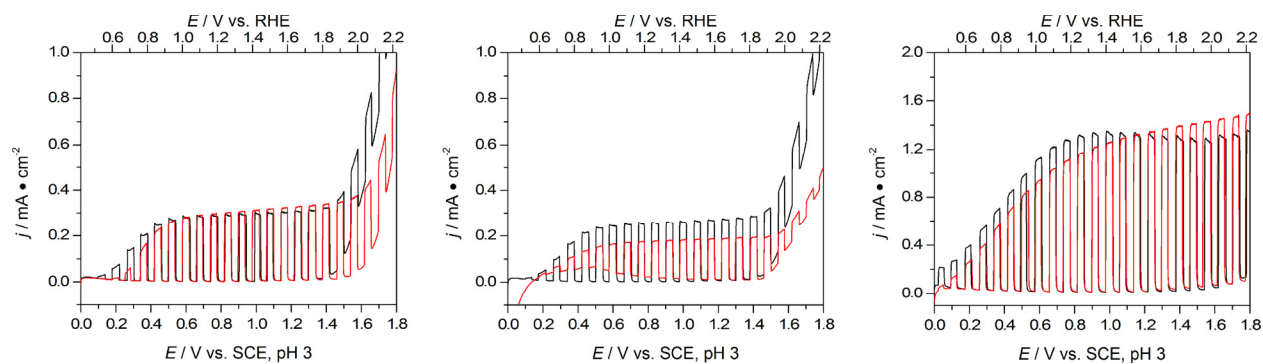

**Figure S7.** Left: Chopped-light LSV of a WO<sub>3</sub> film as prepared (black) and after soaking in CH<sub>3</sub>CN (red); Middle: Chopped-light LSV of a WO<sub>3</sub> film as prepared (black) and after soaking with FeCl<sub>2</sub> (red); Right: Chopped-light LSV of a WO<sub>3</sub> film as prepared (black) and after soaking with tebppmcn (red) in pH 3 0.1 M Na<sub>2</sub>SO<sub>4</sub>, 100 mW cm<sup>-2</sup> AM 1.5G illumination, 20 mV/s, Pt CE, SCE RE.

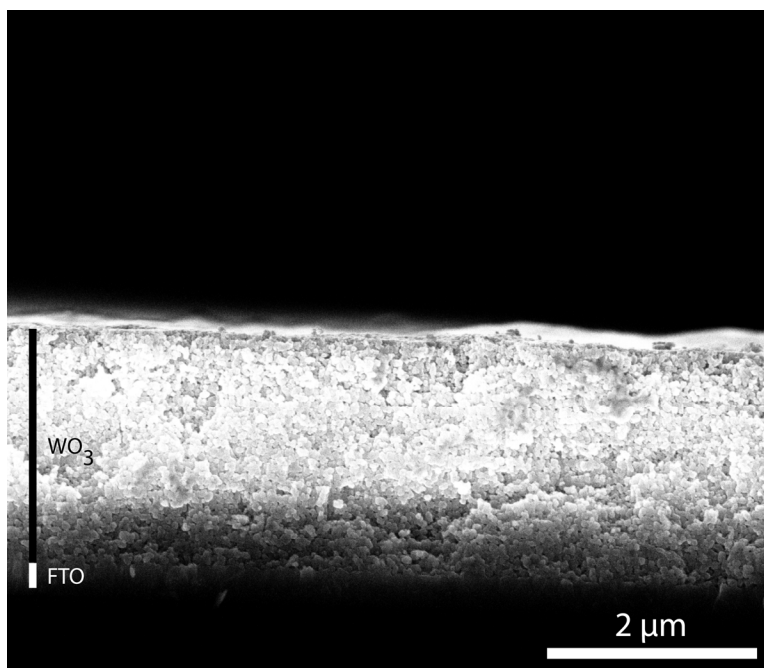

**Figure S8.** SEM of optimized WO<sub>3</sub> photoanodes with a thickness of ~1.8 μm whereas the thinner films were measured to be ~0.6 μm.

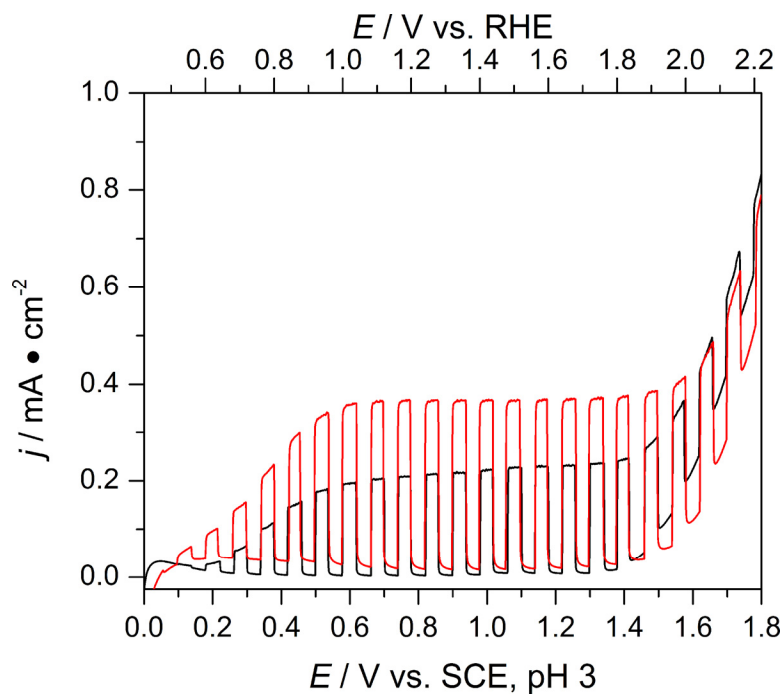

**Figure S9.** Chopped-light LSV of thinner photoanodes in 100 mM  $\text{Na}_2\text{SO}_4$  at pH 3; SCE RE, Pt CE, 100  $\text{mW cm}^{-2}$ , AM 1.5G with as prepared  $\text{WO}_3$  (black) and  $\mathbf{1}\text{-WO}_3$  (red).

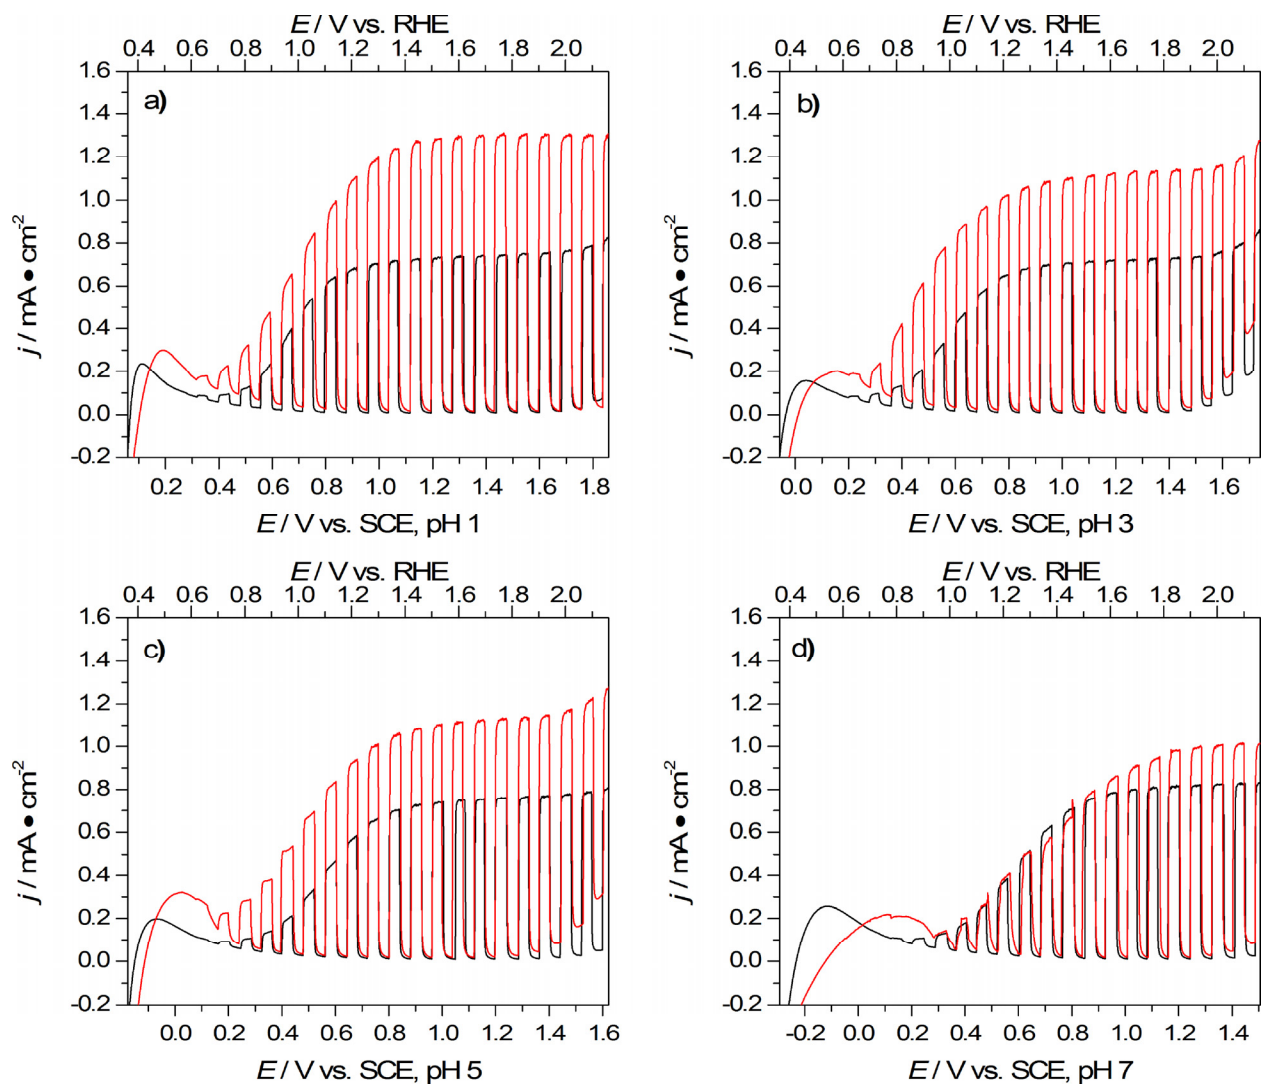

**Figure S10.** Chopped-light LSVs of photoanodes in 100 mM Na<sub>2</sub>SO<sub>4</sub> at pH 1 (a), 3 (b), 5 (c), and 7 (d); SCE RE, Pt CE, 100 mW cm<sup>-2</sup>, AM 1.5G with as prepared WO<sub>3</sub> (black) and 1-WO<sub>3</sub> (red).

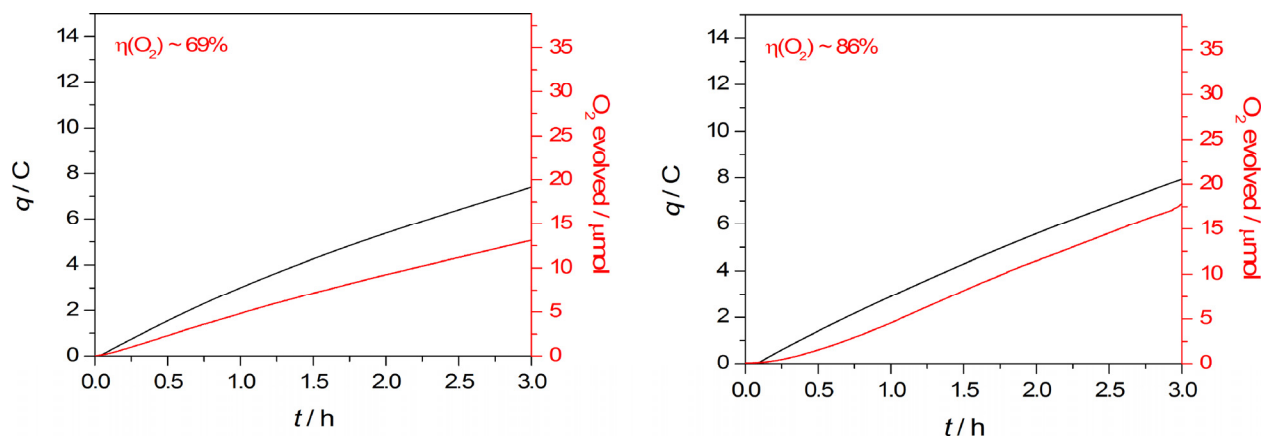

**Figure S11.** Additional Faradaic efficiency experiments of **1-WO<sub>3</sub>** photoanodes in 100 mM Na<sub>2</sub>SO<sub>4</sub> pH 3; potential held at 1.23 V vs. RHE, SCE RE, Pt CE with charge passed (black) and oxygen evolution (red).

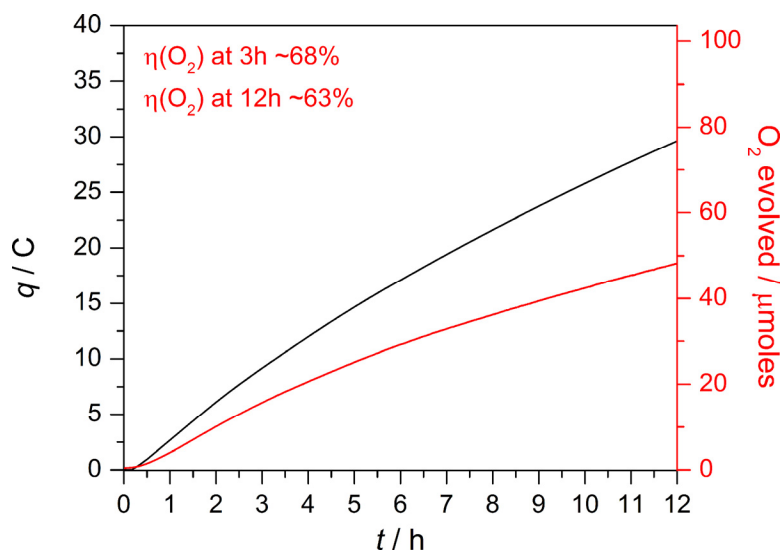

**Figure S12.** Faradaic efficiency of a **1-WO<sub>3</sub>** photoanode in 100 mM Na<sub>2</sub>SO<sub>4</sub> pH 3; potential held at 1.23 V vs. RHE, SCE RE, Pt CE for 12 hours with charge passed (black) and oxygen evolution (red).

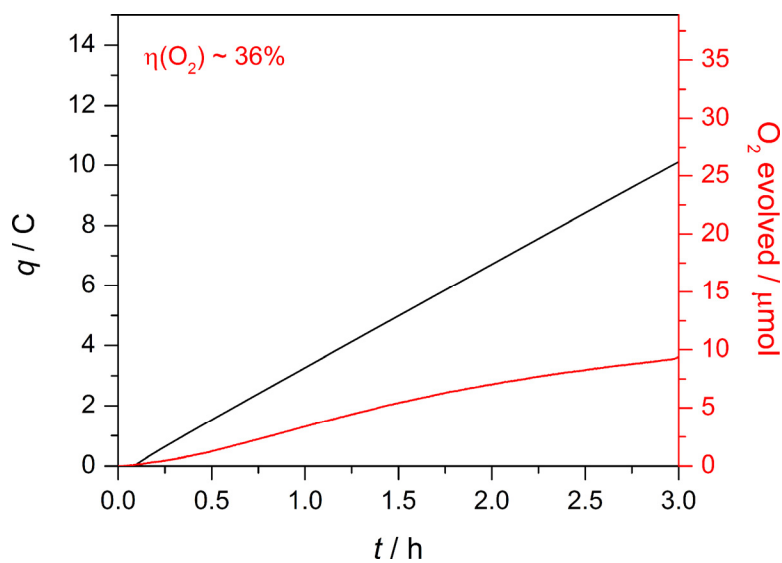

**Figure S13.** Faradaic efficiency of tebppmcn-WO<sub>3</sub> photoanode in 100 mM Na<sub>2</sub>SO<sub>4</sub> pH 3; potential held at 1.23 V vs. RHE, SCE RE, Pt CE with charge passed (black) and oxygen evolution (red).

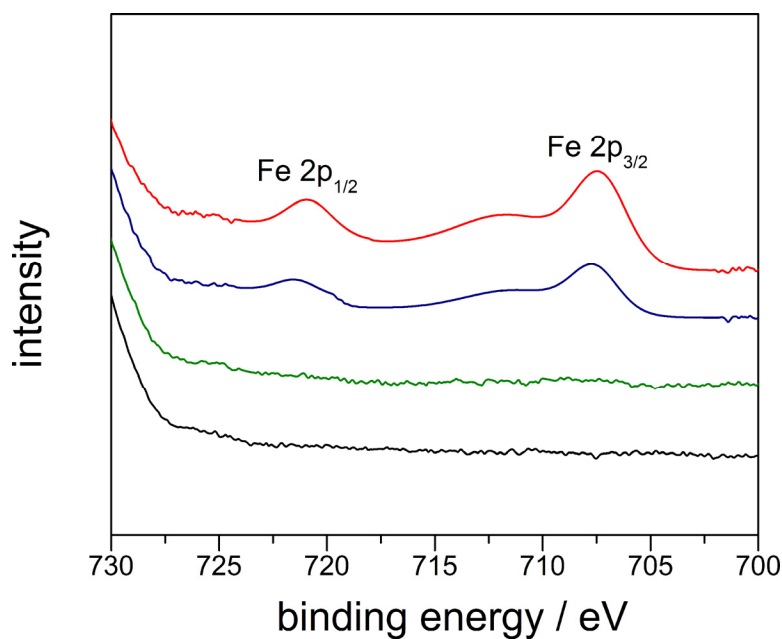

**Figure S14.** X-ray photoelectron spectrum of WO<sub>3</sub> photoanodes as prepared (black), freshly modified with **1** (red), after LSV of **1**-WO<sub>3</sub> in pH 3 Na<sub>2</sub>SO<sub>4</sub> (blue), and after photoelectrolysis of **1**-WO<sub>3</sub> for 3 h (green).

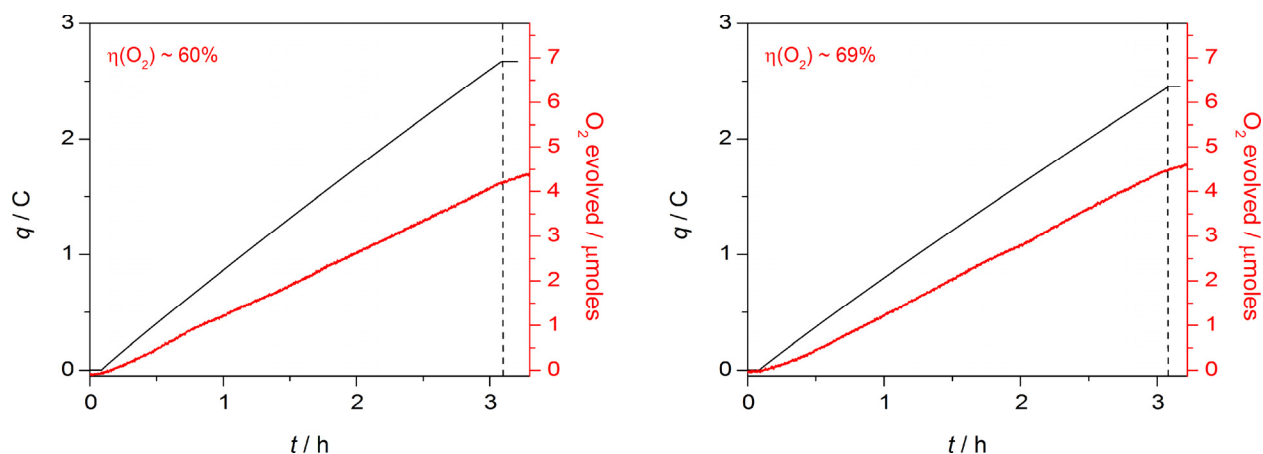

**Figure S15.** Left: First 3 h Faradaic efficiency experiment of a single **1**-WO<sub>3</sub> thinner photoanode in 100 mM Na<sub>2</sub>SO<sub>4</sub> pH 3; Right: Second 3 h Faradaic efficiency experiment of a single **1**-WO<sub>3</sub> thinner photoanode in 100 mM Na<sub>2</sub>SO<sub>4</sub> pH 3 when the potential was held at 1.23 V vs. RHE, SCE RE, Pt CE with charge passed (black) and oxygen evolution (red) the dashed line represents when the light is turned off in both plots.

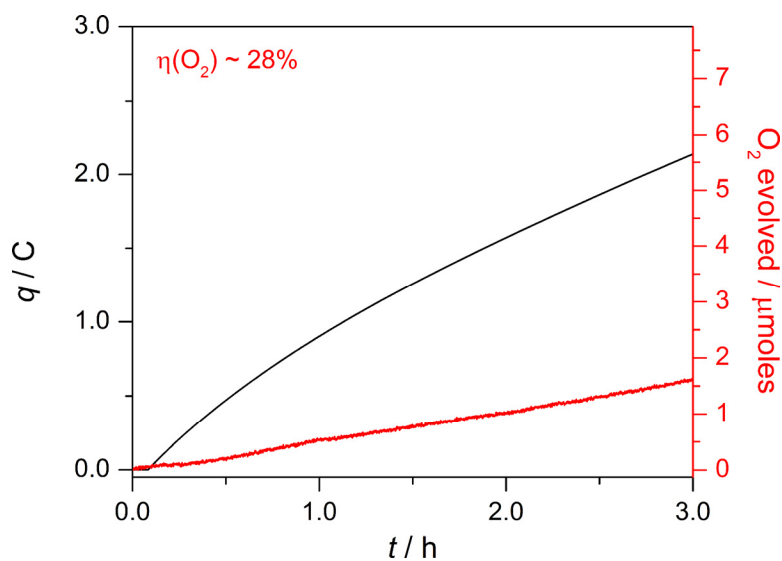

**Figure S16.** Faradaic efficiency of thinner WO<sub>3</sub> photoanode in 500 nM **1** and 100 mM Na<sub>2</sub>SO<sub>4</sub> pH 3; potential held at 1.23 V vs. RHE, SCE RE, Pt CE with charge passed (black) and oxygen evolution (red).

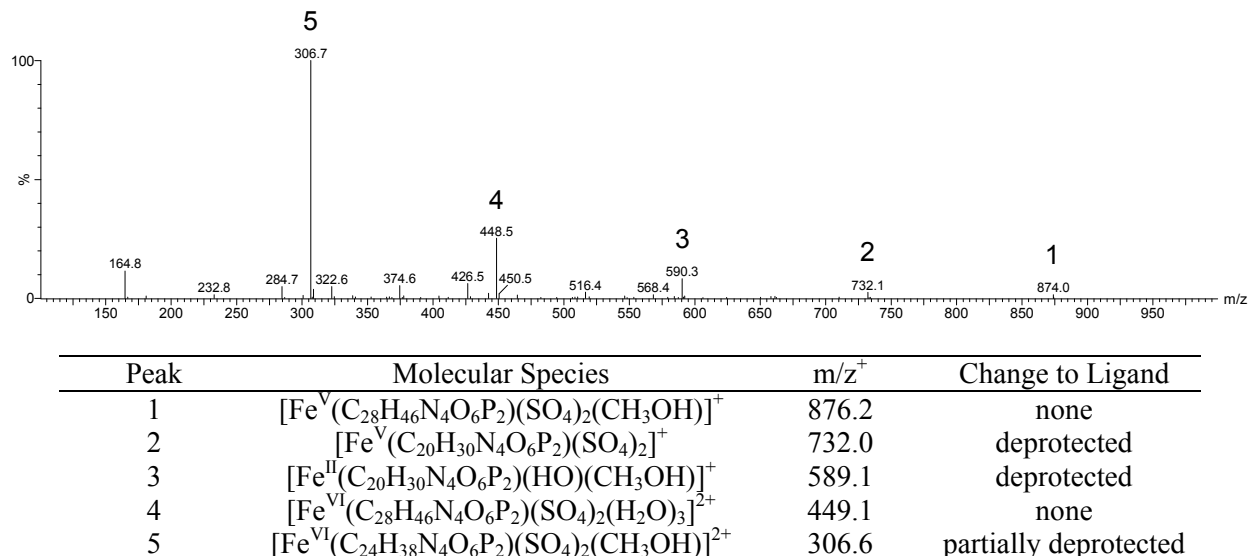

**Figure S17.** Positive electrospray ionization mass spectrometry of electrolyte after 3 hour photoelectrolysis with a 1-WO<sub>3</sub> photoanode in 100 mM Na<sub>2</sub>SO<sub>4</sub> pH 3 at 1.23 V vs. RHE, SCE RE, Pt CE. Table includes major peak labels and the changes to the ligand. Minor peaks were also identified, but were not included for clarity.

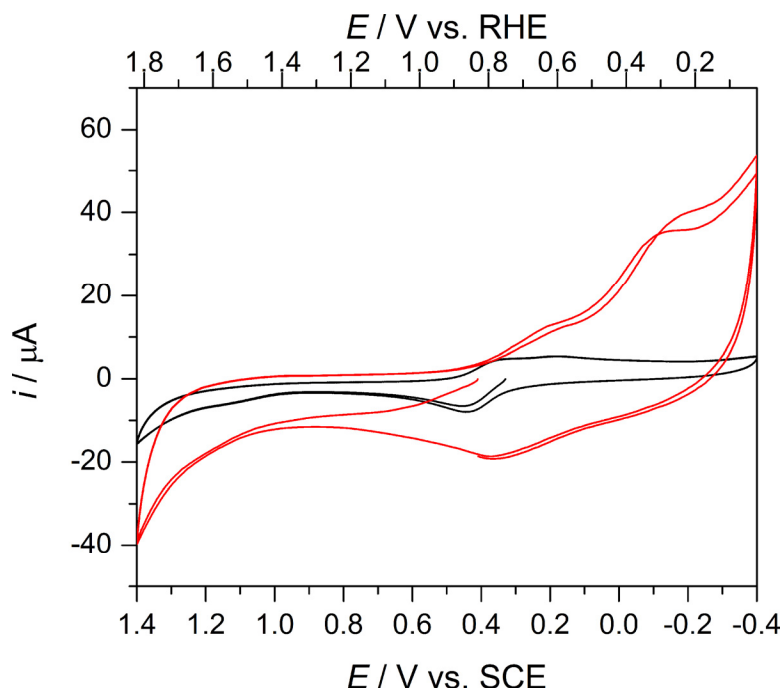

**Figure S18.** Cyclic voltammetry of 1 mM **1** in 100 mM Na<sub>2</sub>SO<sub>4</sub> pH 3 (black) compared to a CV of a concentrated 100 mM Na<sub>2</sub>SO<sub>4</sub> pH 3 solution containing **1** after a 3 hour photoelectrolysis with a 1-WO<sub>3</sub> photoanode (red) recorded with GC WE, SCE RE, and Pt CE at 50 mV/s.

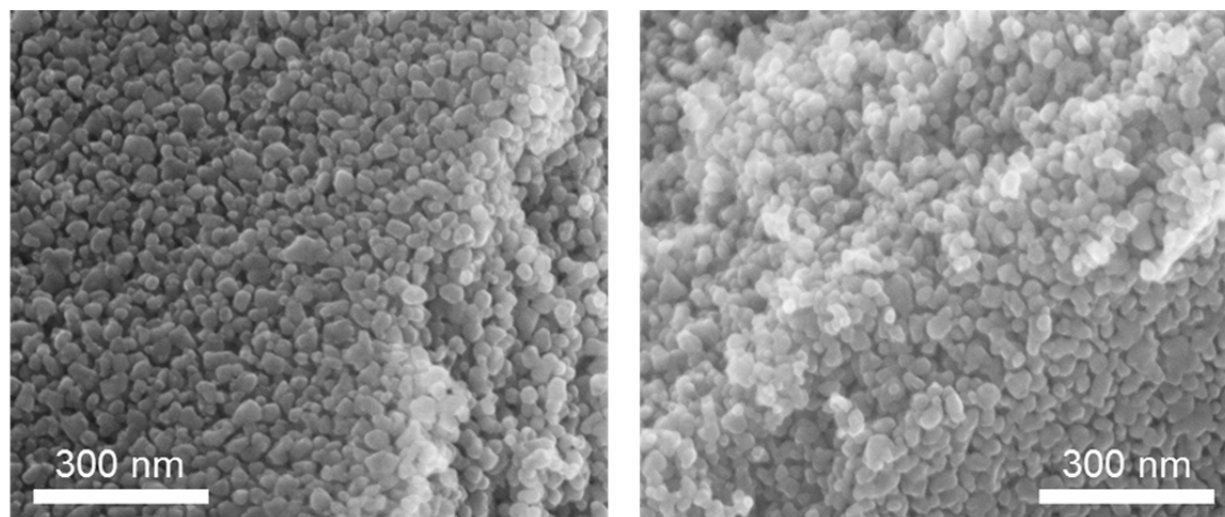

**Figure S19.** SEM of thinner **1**-WO<sub>3</sub> electrodes before (left) and after (right) 3 hour photoelectrolysis where the darker regions represent the plane or face of a larger aggregate on the electrode surface and the lighter regions are over the edge of the larger aggregates.

**Table S1.** Tabulated  $\eta(\text{O}_2)$  % for different WO<sub>3</sub> and **1**-WO<sub>3</sub>.

| Entry     | WO <sub>3</sub> | <b>1</b>   WO <sub>3</sub> | thinner WO <sub>3</sub> | thinner <b>1</b>   WO <sub>3</sub> |
|-----------|-----------------|----------------------------|-------------------------|------------------------------------|
| 1         | 53              | 83                         | 45                      | 62                                 |
| 2         | 64              | 86                         | 30                      | 57                                 |
| 3         | 52              | 69                         | 38                      | 63                                 |
| 4         | —               | —                          | 20                      | 64                                 |
| mean      | 56              | 79                         | 33                      | 62                                 |
| std. dev. | 7               | 9                          | 11                      | 3                                  |

## References

1. Deng, L.; Diao, J.; Chen, P.; Pujari, V.; Yao, Y. p Cheng, G.; Crick, D. C.; Prasad, B. V. V.; Song, Y. *J. Med. Chem.* **2011**, *54*, 4721-4734.
2. Kalek, M.; Jeowska, M.; Stawinski, J. *Adv. Synth. Catal.* **2009**, *351*, 3207-3216.
3. Costas, M.; Que, L. Jr. *Angew. Chem. Int. Ed.* **2002**, *41*, 2179-2181.
4. Santato, C.; Odziemkowski, M.; Ulmann, M.; Augustynski, J. *J. Am. Chem. Soc.* **2001**, *123*, 10639-10649.
